# Supplementary material for: Flow Simulation and Gradient Printing of Fluorapatite- and Cell-Loaded Recombinant Spider Silk Hydrogels
Source: MDPI journal article supplement (doi:10.3390/biom12101413), 2022-10-03
Supplement: s1 [file s1]

# Flow Simulation and Gradient Printing of Fluorapatite and Cell loaded Recombinant Spider Silk Hydrogels

Vanessa J. Neubauer<sup>1</sup>, Florian Hüter<sup>2</sup>, Johannes Wittmann<sup>2</sup>, Vanessa T. Trossmann<sup>1</sup>, Claudia Kleinschrodt<sup>2</sup>, Bettina Alber-Laukant<sup>2</sup>, Frank Rieg<sup>2,3,4</sup> and Thomas Scheibel<sup>\*1,5,6,7,8</sup>

- <sup>1</sup> Lehrstuhl Biomaterialien, Fakultät für Ingenieurwissenschaften, Universität Bayreuth, Prof.-Rüdiger-Bormann-Straße 1, 95447 Bayreuth, Germany
  - <sup>2</sup> Lehrstuhl Konstruktionslehre und CAD, Fakultät für Ingenieurwissenschaften, Universität Bayreuth, Universitätsstraße 30, 95440 Bayreuth, Germany
  - <sup>3</sup> Bayreuth Engine Research Center (BERC), Universität Bayreuth, Universitätsstraße 30, 95440 Bayreuth, Germany
  - <sup>4</sup> Zentrum für Energietechnik (ZET), Universität Bayreuth, Universitätsstraße 30, 95440 Bayreuth, Germany.
  - <sup>5</sup> Bayreuther Zentrum für Kolloide und Grenzflächen (BZKG), Universität Bayreuth, Universitätsstraße 30, 95440 Bayreuth, Germany
  - <sup>6</sup> Bayerisches Polymerinstitut (BPI), Universitätsstraße 30, 95440 Bayreuth, Germany
  - <sup>7</sup> Bayreuther Zentrum für Molekulare Biowissenschaften (BZMB), Universität Bayreuth, Universitätsstraße 30, 95440 Bayreuth, Germany
  - <sup>8</sup> Bayreuther Materialzentrum (BayMAT), Universität Bayreuth, Universitätsstraße 30, 95440 Bayreuth, Germany
- \* Correspondence: TS thomas.scheibel@bm.uni-bayreuth.de

**Citation:** Neubauer, V.J.; Hüter, F.; Wittmann, J.; Trossmann, V.T.; Kleinschrodt, C.; Alber-Laukant, B.; Rieg, F.; Scheibel, T. Flow Simulation and Gradient Printing of Fluorapatite and Cell loaded Recombinant Spider Silk Hydrogels. *Biomolecules* **2022**, *12*, 1413.  
<https://doi.org/10.3390/biom12101413>

Academic Editors: Jayakumar Rajadas and Mustafeez Mujtaba Babar

Received: 25 August 2022

Accepted: 27 September 2022

Published: 3 October 2022

**Publisher's Note:** MDPI stays neutral with regard to jurisdictional claims in published maps and institutional affiliations.

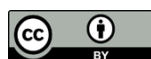

**Copyright:** © 2022 by the authors. Licensee MDPI, Basel, Switzerland. This article is an open access article distributed under the terms and conditions of the Creative Commons Attribution (CC BY) license (<https://creativecommons.org/licenses/by/4.0/>).

## Content on pages S2-S4

**Figure S1.** Simulation model.

**Figure S2.** Gradient printing pre-studies.

**Figure S3.** Rheology.

**Figure S4.** Fluorapatite characterization.

**Figure S5.** DIN EN ISO 10993-5 results for particle species.

Additional Information: **Video S1.** Flow Simulation.

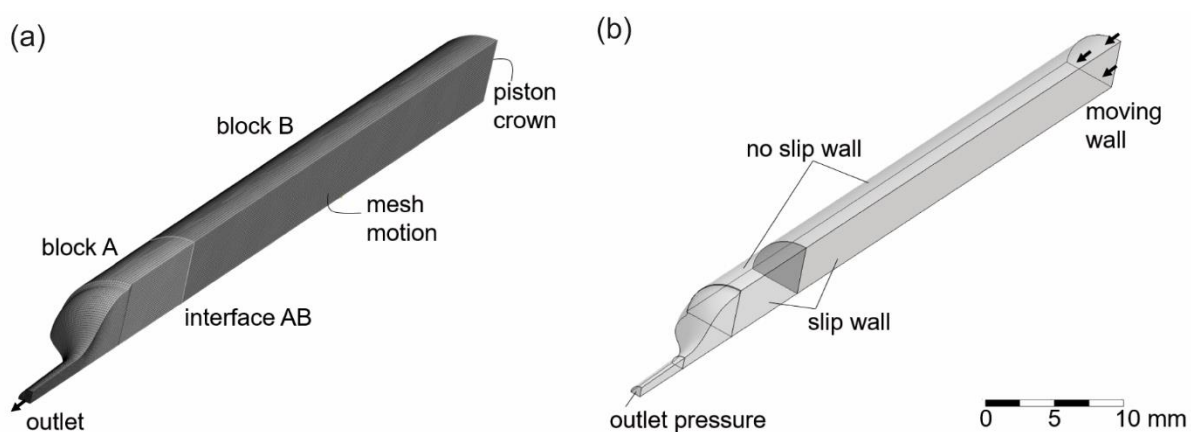

**Figure S1.** Cartridge model for the simulation of the a) AB block-system and mesh as slip wall and b) AB block boundary conditions.

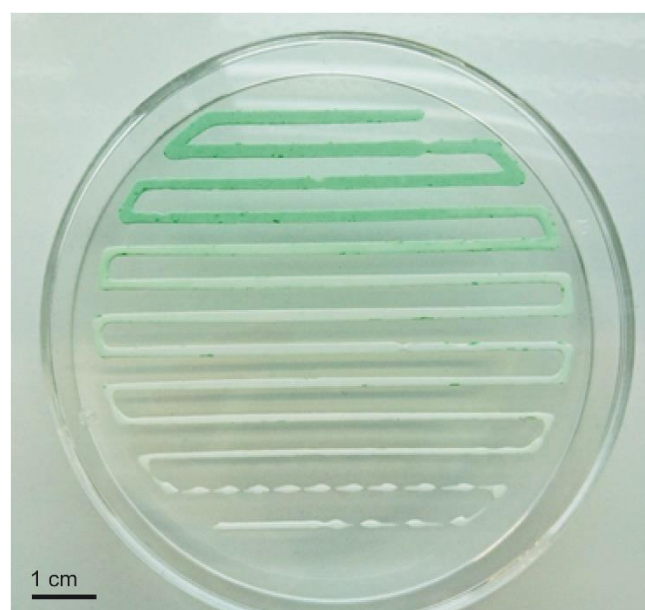

**Figure S2.** Photograph of 3D gradient printing results with coloured water-in-oil emulsion as an exemplary AB block system.

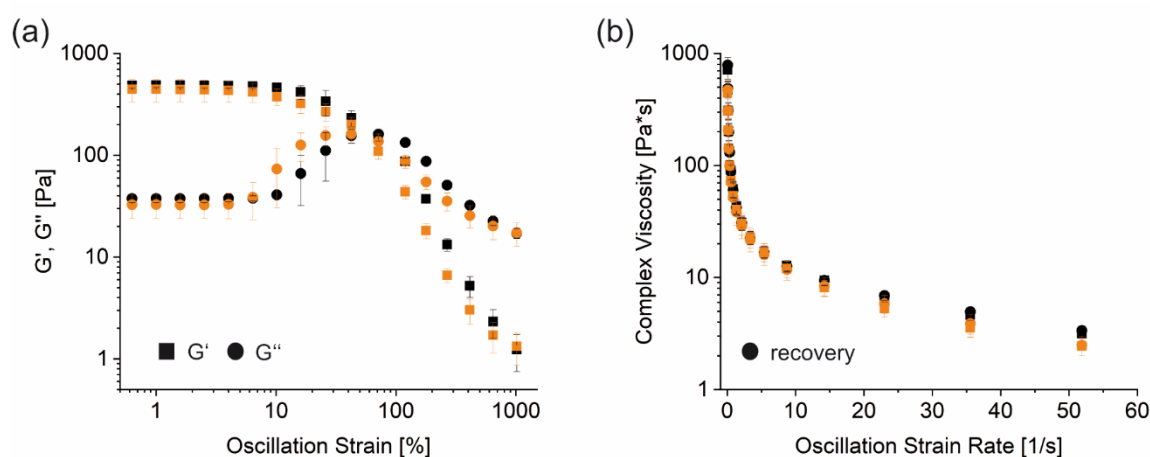

**Figure S3.** Rheological characterization of 3 % w/v eADF4(C16) (black) and eADF4(C16)/FITC-eADF4(C16) (orange) hydrogels: a) Mean amplitude sweep measurements with yield points at the  $G'$  and  $G''$  cross-over. b) Mean frequency sweep measurements showing shear-thinning behaviour and recovery.

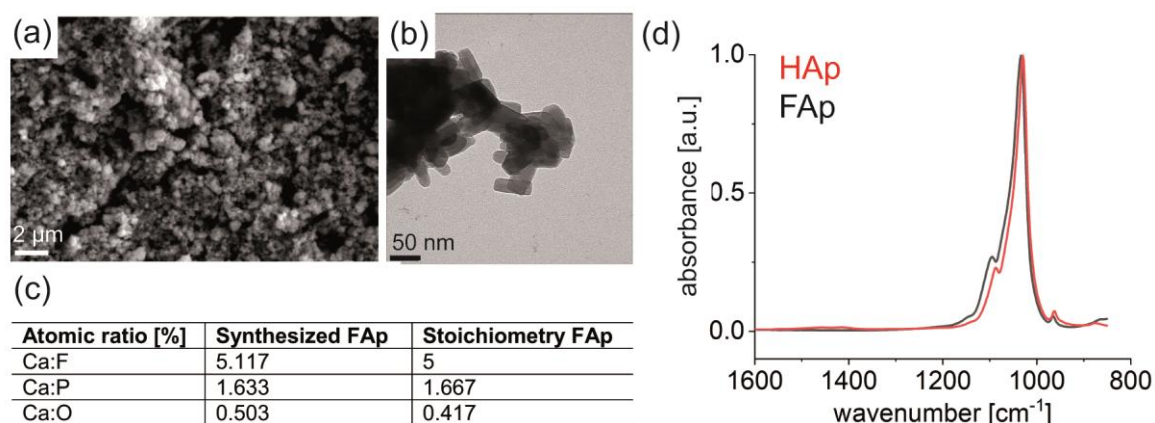

**Figure S4.** Characterization of fluorapatite (FAP) particles: a) SEM image of dry FAP particles. b) TEM images of FAP particles. c) SEM-EDX analysis derived atomic ratio of typical elements in FAP compared to its stoichiometry in %. d) Mean ATR-FTIR spectra overlay of synthesized FAP particles (black) with that of commercially available hydroxyapatite particles (red) as reference.

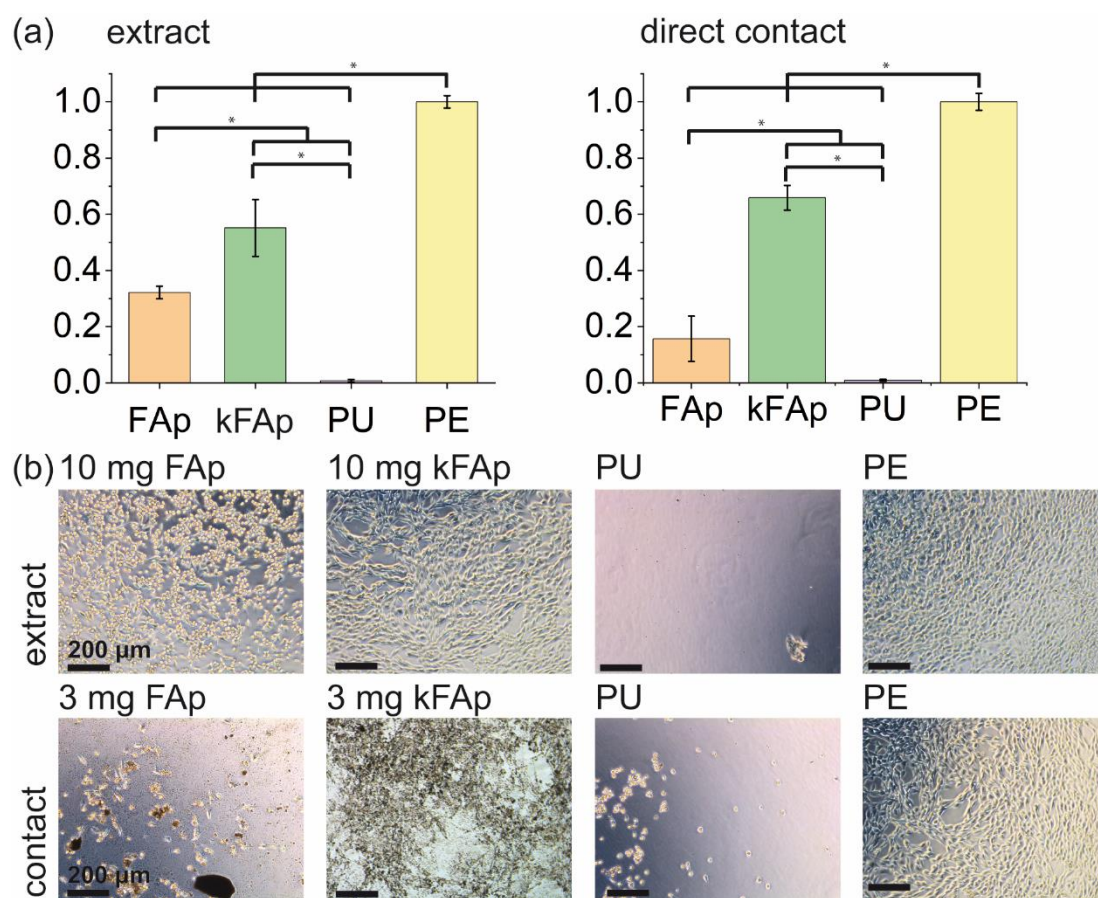

**Figure S5.** Cytotoxicity evaluation of uncoated (FAP) and eADF4( $\kappa$ 16)-coated ( $\kappa$ FAP) fluorapatite particles according to DIN EN ISO 10993-5. a) Quantified viability using Cell Titer Blue assay and b) cell morphology of BALB/3T3 fibroblasts upon direct contact or upon contact with an extract of particles. High density polyethylene served as positive and organotin-stabilized polyurethane as negative control for extract and direct contact test ( $n=3$  for all conditions). Extract and direct contact tests were analysed using light microscopy, scale bar 200  $\mu$ m.  $\kappa$ FAP refers to FAP particles coated with eADF4( $\kappa$ 16).
